# Supplementary material for: Target-assisted self-cleavage DNAzyme electrochemical biosensor for MicroRNA detection with signal amplification
Source: Royal Society of Chemistry journal article supplement (doi:10.1039/d4cc04190a), 2024-01-01
Supplement: d4cc04190a1.pdf [file d4cc04190a1.pdf]

# Supplementary Information

## **Target-assisted self-cleavage DNzyme electrochemical biosensor for MicroRNA detection with signal amplification**

Juan Zhang, Benting Xie, Haonan He, Hejun Gao, Fang Liao\*, Hongquan Fu\*,  
Yunwen Liao

*College of Chemistry and Chemical Engineering, Chemical Synthesis and Pollution  
Control Key Laboratory of Sichuan Province, Institute of Applied Chemistry, China  
West Normal University, Nanchong, Sichuan 637000, China*

\*Corresponding Author:

E-mail: [liaofang407@163.com](mailto:liaofang407@163.com) (F. Liao); [fubestone@163.com](mailto:fubestone@163.com) (F. Q. Fu)

### **Table of contents**

|                                |     |
|--------------------------------|-----|
| Materials and Reagents.....    | S-2 |
| Apparatus.....                 | S-2 |
| Construction of Biosensor..... | S-2 |
| Table S1.....                  | S-4 |
| Figure S1.....                 | S-5 |
| Calculation of LOD.....        | S-6 |
| Figure S2.....                 | S-6 |
| Table S2.....                  | S-7 |
| Figure S3.....                 | S-8 |
| References.....                | S-9 |

**Materials and Reagents.** All oligonucleotides, TE buffer (1×, low EDTA, PH 8.0), 5×TBE buffer (250 mM Tris, 10 mM EDTA, 250 mM H<sub>3</sub>BO<sub>3</sub>, pH 8.0), and agarose (conventional) were purchased by Sangon Biotech Co., Ltd. (Shanghai, China). Chloroauric acid (HAuCl<sub>4</sub>·3H<sub>2</sub>O, AR), magnesium chloride (MgCl<sub>2</sub>, AR), potassium chloride (KCl, AR), hexamercaptan (HT, 96%), disodium hydrogen phosphate (Na<sub>2</sub>HPO<sub>4</sub>, AR), potassium dihydrogen phosphate (KH<sub>2</sub>PO<sub>4</sub>, AR), potassium ferricyanide (K<sub>3</sub>[Fe(CN)<sub>6</sub>, AR), potassium ferrocyanide (K<sub>4</sub>[Fe(CN)<sub>6</sub>, AR). Alumina polishing powder was purchased from Tianjin Aida Hengsheng Technology Development Co., Ltd. (Tianjin, China). A 5.0 mM [Fe(CN)<sub>6</sub>]<sup>3-/4-</sup> solution (5.0 mM K<sub>3</sub>[Fe(CN)<sub>6</sub>], 5.0 mM K<sub>4</sub>[Fe(CN)<sub>6</sub>], 0.1 M KCl, pH 7.4) was used as the supporting electrolyte for cyclic voltammetry (CV) and electrochemical impedance spectroscopy (EIS) detection. Prepare square wave voltammetry (SWV) detection buffer with PBS. The aqueous solution was prepared from ultrapure water (Shanghai Hetai Instrument Co., Ltd.) obtained by the Hitech-Sciencetool water purification system. Oligonucleotide sequences were synthesized by Sangon Biotech Co., Ltd. (Shanghai, China), and the sequences were listed in Table S1.

**Apparatus.** In this work, all electrochemical measurements were performed at the CHI 660E electrochemical workstation (Shanghai Chenghua Instrument Co., Ltd.) using a conventional three-electrode system, in which the glassy carbon electrode (GCE, Φ = 4 mm) was the working electrode, the Ag/AgCl electrode (saturated KCl) was the reference electrode, and the platinum wire was the auxiliary electrode. The electrodes used in the experiment were purchased from Tianjin Aida Hengsheng Technology Development Co., Ltd. (Tianjin, China). 4% agarose gel electrophoresis results were obtained in JY300E.

**Construction of Biosensor.** First, the Φ = 4 mm glassy carbon electrode (GCE) was polished by aluminum oxide powder (0.3 μM and 0.05 μM) and ultrasonicated in ethanol and water for 1 min, respectively. Then, in order to modify the electrode, the pretreatment GCE electrodeposited -0.2V for 30 s in 1 % HAuCl<sub>4</sub> solution for the formation of Au nanoparticles (dep-Au) to obtain Au nanoparticles modified layer (named GCE/dep-Au). In sequence, with the help of Au-S bond, probe DNzyme (10

$\mu\text{L}$ , 3  $\mu\text{M}$ ) was successfully incubated on the dried electrode overnight at 4 °C. Separating excess substances with distilled water, then the resultant electrode was incubated with HT (10  $\mu\text{L}$ , 5 mM) for 30 min for blocking the nonspecific sites. At last, the assembled electrode was washed with distilled water to remove unbound substances for further use.

**Table S1.** The sequences are listed below as text sequences annotated with segment names.

| <b>Names</b>            | <b>Sequence (5' to 3')</b>                                                            |
|-------------------------|---------------------------------------------------------------------------------------|
| DNAzyme                 | GGGGTATTTAACTrAGGTCTTTTTTTTTGACTCCGAGCCGGACGA<br>AGTTCAAACCTGACATTTTTTTTTTT           |
| Dual-labeled<br>DNAzyme | Fc-<br>GGGGTATTTAACTrAGGTCTTTTTTTTTGACTCCGAGCCGGACGA<br>AGTTCAAACCTGACATTTTTTTTTTT-SH |
| miRNA-223               | TGTCAGTTTGTCAAATACCCCA                                                                |
| miRNA-122               | TGGAGTGTGACAATGGTGTTTG                                                                |
| miRNA-21                | TAGCTTATCAGACTGATGTTGA                                                                |
| miRNA-155               | TTAATGCTAATCGTGATAGGGGT                                                               |
| miRNA-16                | TAGCAGCACGTAAATATTGGCG                                                                |

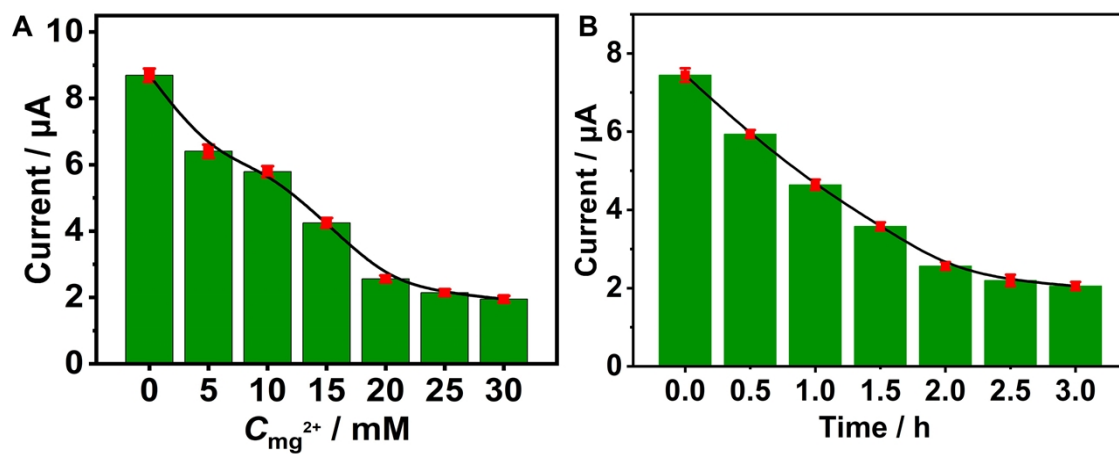

**Figure S1.** Effects of (A)  $Mg^{2+}$  concentration and (B) reaction time on the electrochemical responses. The SWV signals were monitored with 50 nM miRNA-223. Error bars: SD,  $n = 3$ .

## Calculation of LOD

According to related references and the IUPAC recommendation<sup>1-3</sup>, the limit of detection (LOD) was estimated as  $LOD = kS_b/m$ , in which  $S_b$  was the standard deviation of the blank signals ( $n_b = 20$ ),  $m$  was the analytical sensitivity which could be estimated as the slope of calibration curve at lower concentration ranges and  $k$  is the numerical factor chosen in accordance with the desired confidence level. As suggested by Long and Winefordner<sup>4</sup>, the use of  $k = 3$  allows a confidence level of 99.86% for a normal distribution of the blank signals. So, LOD was usually defined as  $LOD = 3S_b/m$ . Firstly, to calculate the LOD of the AND measuring automata, the trends of current change values with the concentration of miRNA-223 was showed. As shown in Figure S2, the insert presented that current change values ( $\Delta I$ ) were linearly related to the concentration of miRNA-223 ( $c$  / fM) at a low concentration range. The corresponding linear equation was  $\Delta I = -0.1150 c + 6.8066$  and the  $S_b$  of twenty times zero-dose was about 0.07351. Therefore, the LOD of the proposed measuring biosensor were 1.92 fM ( $LOD = 3 \times 0.07351 \div 0.1150 = 1.92$  fM).

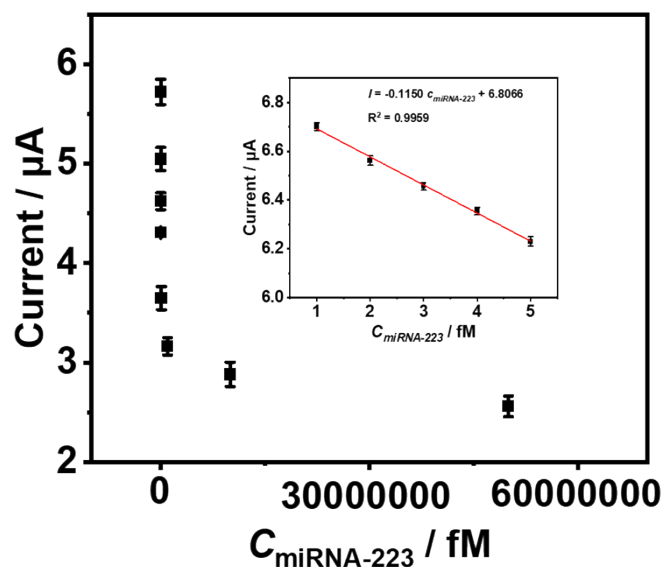

**Figure S2.** (A) The variation trend of electrochemical sensing system responses with miRNA-223 concentration. The inset shows the calibration curve of current change responses changing with the target in the lower concentration range.

**Table S2.** Comparison of different methods for miRNA detection

| <b>detection methods</b>                 | <b>detection range</b> | <b>detection limit</b> | <b>ref</b> |
|------------------------------------------|------------------------|------------------------|------------|
| Fluorescence                             | 0.2 nM~10 nM           | Not mentioned          | 5          |
| Fluorescent                              | 50 fM~30 nM            | 269 fM                 | 6          |
| Fluorescence                             | 100 fM-100 nM          | Not mentioned          | 7          |
| surface-enhanced Raman scattering (SERS) | 1 fM to 100 nM         | 374 aM                 | 8          |
| Fluorescence                             | 2~25 nM                | 0.45 nM                | 9          |
| ECL                                      | 10 fM~50 nM            | 1.92 fM                | This work  |

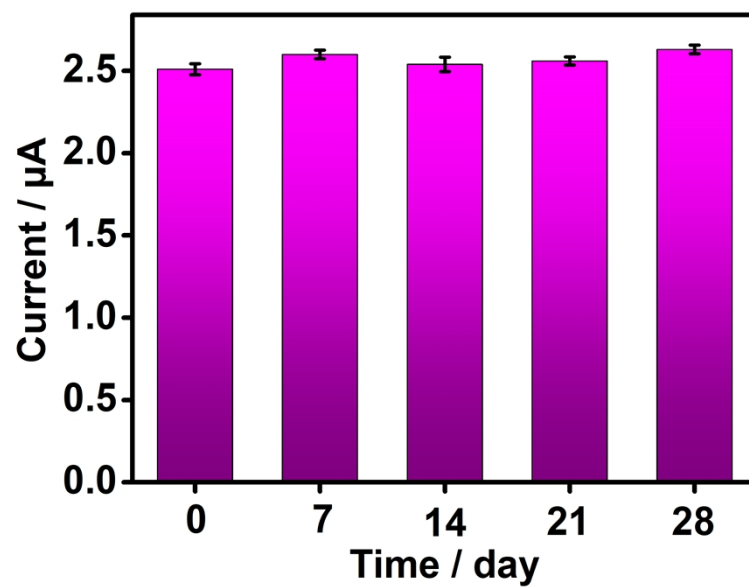

**Figure S3.** Stability of the designed strategy. Error bars: SD, n = 3.



## References

- (1) Buck, R. P.; Lindner, E. Recommendations for nomenclature of ion-selective electrodes-(IUPAC recommendations 1994). *Pure Appl. Chem.* **1994**, *66*, 2527-2536.
- (2) Currie, L. A. Nomenclature in evaluation of analytical methods including detection and quantification capabilities (IUPAC recommendations 1995). *Pure Appl. Chem.* **1995**, *67*, 1699-1723.
- (3) Radi, A. E.; Acero Sánchez, J. L.; Baldrich, E.; O'Sullivan, C. K. Reagentless, reusable, ultrasensitive electrochemical molecular beacon aptasensor. *J. Am. Chem. Soc.* **2006**, *128*, 117-124.
- (4) Long, G. L.; Winefordner, J. D. Limit of detection. A closer look at the IUPAC definition. *Anal. Chem.* **1983**, *55*, 712A-724A.
- (5) Zhao, H.; Wang, M.; Xiong, X.; Liu, Y.; Chen, X., Simultaneous fluorescent detection of multiplexed miRNA of liver cancer based on DNA tetrahedron nanotags. *Talanta* **2020**, *210*, 120677.
- (6) Yao, C.; Liu, X.; Lu, X.; Wang, L.; Jia, J.; Li, Z., Smartphone-Based Fluorescent Profiling of Quaternary MicroRNAs in Urine for Rapid Diagnosis of Urological Cancers Using a Multiplexed Isothermal Exponential Amplification Reaction. *Anal. Chem.* **2024**, *96*, 419-426.
- (7) Qian, J.; Zhang, Q.; Liu, M.; Wang, Y.; Lu, M., A portable system for isothermal amplification and detection of exosomal microRNAs. *Biosens. Bioelectron.* **2022**, *196*, 113707.
- (8) Wu, J.; Zhou, X.; Li, P.; Lin, X.; Wang, J.; Hu, Z.; Zhang, P.; Chen, D.; Cai, H.; Niessner, R.; Haisch, C.; Sun, P.; Zheng, Y.; Jiang, Z.; Zhou, H., Ultrasensitive and Simultaneous SERS Detection of Multiplex MicroRNA Using Fractal Gold Nanotags for Early Diagnosis and Prognosis of Hepatocellular Carcinoma. *Anal. Chem.* **2021**, *93*, 8799-8809.
- (9) Wan, Y. H.; Zhou, Y. J.; Xiao, K. J.; Nie, C. P.; Zhang, J.; Liu, C.; Chen, T. T.; Chu, X., Target-assisted self-cleavage DNzyme probes for multicolor simultaneous imaging of tumor-related microRNAs with signal amplification. *Chem. Commun.* **2019**, *55*, 3278-3281.
